# Supplementary material for: Outcomes of a National, Cross-Sector Antimicrobial Stewardship Training Initiative for Pharmacists in England
Source: MDPI journal article supplement (doi:10.3390/pharmacy9040165), 2021-10-10
Supplement: s1 [file s1]

Learner improvement project activities (n=83)

| Sector                 | Topic category                     | Improvement topic                                                                                                                          | Intervention or change idea                                | Intervention category          | COM-B    | Secured input or support from colleagues to undertake QI project | Collected data that improved understanding of problem | Gained new learning from implementing and evaluating a test of change (PDSA cycle) | Shared information and awareness about initiative outside of core team | Educated others to develop knowledge skills, attitudes |
|------------------------|------------------------------------|--------------------------------------------------------------------------------------------------------------------------------------------|------------------------------------------------------------|--------------------------------|----------|------------------------------------------------------------------|-------------------------------------------------------|------------------------------------------------------------------------------------|------------------------------------------------------------------------|--------------------------------------------------------|
| Community Health Trust | UTI                                | UTI prescribing                                                                                                                            | Education and promotion                                    | Education and promotion        | C        | Yes                                                              | Yes                                                   | Yes                                                                                | Yes                                                                    | Yes                                                    |
| Primary Care           | Broad spectrum antimicrobials      | Reducing prescribing of broad-spectrum antibiotics in GP surgeries                                                                         | Audit and feedback facilitated supported through EMIS      | Prospective audit and feedback | Multiple | Yes                                                              |                                                       | Yes                                                                                |                                                                        | Yes                                                    |
| Primary Care           | Lower respiratory tract infections | Prescribing variation in primary care: Utilising resources to reduce inappropriate prescribing with a focus on respiratory tract infection | TARGET 'treat your infection' leaflet F12 protocol on EMIS | Use of practice aids           | O        | Yes                                                              |                                                       | Yes                                                                                | Yes                                                                    |                                                        |
| Primary Care           | Lower respiratory tract infections | Respiratory tract infection antibiotic prescribing                                                                                         | Access to TARGET leaflets in prescribing software          | Use of practice aids           | O        | Yes                                                              |                                                       | Yes                                                                                | Yes                                                                    | Yes                                                    |

## Learner improvement project activities (n=83)

| Sector         | Topic category                     | Improvement topic                                                                                       | Intervention or change idea                                                           | Intervention category          | COM-B    | Secured input or support from colleagues to undertake QI project | Collected data that improved understanding of problem | Gained new learning from implementing and evaluating a test of change (PDSA cycle) | Shared information and awareness about initiative outside of core team | Educated others to develop knowledge skills, attitudes |
|----------------|------------------------------------|---------------------------------------------------------------------------------------------------------|---------------------------------------------------------------------------------------|--------------------------------|----------|------------------------------------------------------------------|-------------------------------------------------------|------------------------------------------------------------------------------------|------------------------------------------------------------------------|--------------------------------------------------------|
| Primary Care   | Broad spectrum antimicrobials      | High-risk antimicrobial audit and feedback in primary care                                              | Audit and feedback (using validated tool from elsewhere)                              | Prospective audit and feedback | Multiple | Yes                                                              |                                                       | Yes                                                                                | Yes                                                                    |                                                        |
| Primary Care   | Lower respiratory tract infections | Reducing inappropriate prescribing of antibiotic rescue packs for Chronic Obstructive Pulmonary Disease | New procedures for management and review of COPD antibiotic rescue pack prescriptions | Restriction                    | O        | Yes                                                              |                                                       | Yes                                                                                | Yes                                                                    | Yes                                                    |
| Primary Care   | Broad spectrum antimicrobials      | Broad spectrum antibiotic prescribing                                                                   | <i>C. Diff</i> review form                                                            | Prospective audit and feedback | Multiple | Yes                                                              | Yes                                                   |                                                                                    |                                                                        |                                                        |
| Secondary Care | Documentation of indication        | Documentation of antibiotic indication                                                                  | Education sessions; future plans for EPMA alert                                       | Electronic prescribing         | Multiple | Yes                                                              |                                                       | Yes                                                                                | Yes                                                                    | Yes                                                    |

Learner improvement project activities (n=83)

| Sector         | Topic category         | Improvement topic                                                                                                            | Intervention or change idea                              | Intervention category          | COM-B    | Secured input or support from colleagues to undertake QI project | Collected data that improved understanding of problem | Gained new learning from implementing and evaluating a test of change (PDSA cycle) | Shared information and awareness about initiative outside of core team | Educated others to develop knowledge skills, attitudes |
|----------------|------------------------|------------------------------------------------------------------------------------------------------------------------------|----------------------------------------------------------|--------------------------------|----------|------------------------------------------------------------------|-------------------------------------------------------|------------------------------------------------------------------------------------|------------------------------------------------------------------------|--------------------------------------------------------|
| Secondary Care | Diagnostic stewardship | Reducing the number of urine dips requested in patients over 65 years to diagnose urinary tract infections in acute medicine | Education and promotion, inviting staff to sign a pledge | Role modelling                 | O        | Yes                                                              | Yes                                                   | Yes                                                                                | Yes                                                                    | Yes                                                    |
| Secondary Care | UTI                    | Improving prescribing practices in patients with UTI                                                                         | Education and promotion                                  | Education and promotion        | C        | Yes                                                              | Yes                                                   | Yes                                                                                | Yes                                                                    | Yes                                                    |
| Secondary Care | 48-72 hour review      | 48-72 hour antibiotic reviews                                                                                                | Audit and feedback facilitated by mobile app             | Prospective audit and feedback | Multiple | Yes                                                              |                                                       | Yes                                                                                | Yes                                                                    |                                                        |
| Secondary Care | 48-72 hour review      | 72 hour antibiotic reviews                                                                                                   | Audit and feedback facilitated by mobile app             | Prospective audit and feedback | Multiple | Yes                                                              |                                                       | Yes                                                                                | Yes                                                                    |                                                        |

Learner improvement project activities (n=83)

| Sector         | Topic category                     | Improvement topic                                                        | Intervention or change idea                                         | Intervention category | COM-B | Secured input or support from colleagues to undertake QI project | Collected data that improved understanding of problem | Gained new learning from implementing and evaluating a test of change (PDSA cycle) | Shared information and awareness about initiative outside of core team | Educated others to develop knowledge skills, attitudes |
|----------------|------------------------------------|--------------------------------------------------------------------------|---------------------------------------------------------------------|-----------------------|-------|------------------------------------------------------------------|-------------------------------------------------------|------------------------------------------------------------------------------------|------------------------------------------------------------------------|--------------------------------------------------------|
| Secondary Care | Lower respiratory tract infections | Clarithromycin prescribing in mild-moderate community acquired pneumonia | Use of CURB score documentation as a prompt                         | Prompts and reminders | M     | Yes                                                              | Yes                                                   | Yes                                                                                |                                                                        |                                                        |
| Secondary Care | Lower respiratory tract infections | Community acquired pneumonia                                             | Intervention package: CURB score documentation , ward stock changes | Restriction           | O     | Yes                                                              | Yes                                                   | Yes                                                                                |                                                                        |                                                        |
| Secondary Care | Lower respiratory tract infections | Co-amoxiclav prescribing in community acquired pneumonia                 | Prompt documentation of CURB score and review plan                  | Prompts and reminders | M     | Yes                                                              | Yes                                                   | Yes                                                                                | Yes                                                                    |                                                        |

Learner improvement project activities (n=83)

| Sector         | Topic category                   | Improvement topic                                                                                          | Intervention or change idea                                            | Intervention category  | COM-B | Secured input or support from colleagues to undertake QI project | Collected data that improved understanding of problem | Gained new learning from implementing and evaluating a test of change (PDSA cycle) | Shared information and awareness about initiative outside of core team | Educated others to develop knowledge skills, attitudes |
|----------------|----------------------------------|------------------------------------------------------------------------------------------------------------|------------------------------------------------------------------------|------------------------|-------|------------------------------------------------------------------|-------------------------------------------------------|------------------------------------------------------------------------------------|------------------------------------------------------------------------|--------------------------------------------------------|
| Secondary Care | Timely antibiotic administration | Reducing the time from prescribing to administration of restricted antimicrobials in the inpatient setting | New procedure for ordering and dispensing of restricted antimicrobials | Guideline or procedure | O     | Yes                                                              | Yes                                                   | Yes                                                                                | Yes                                                                    | Yes                                                    |
| Secondary Care | Timely antibiotic administration | Time to administration of IV antibiotics for diabetes foot infections in the Diabetes and Endocrine Unit   | New procedure for initiating antibiotic therapy in the unit            | Guideline or procedure | O     | Yes                                                              | Yes                                                   | Yes                                                                                | Yes                                                                    |                                                        |

Learner improvement project activities (n=83)

| Sector         | Topic category              | Improvement topic                                                                     | Intervention or change idea                                       | Intervention category  | COM-B | Secured input or support from colleagues to undertake QI project | Collected data that improved understanding of problem | Gained new learning from implementing and evaluating a test of change (PDSA cycle) | Shared information and awareness about initiative outside of core team | Educated others to develop knowledge skills, attitudes |
|----------------|-----------------------------|---------------------------------------------------------------------------------------|-------------------------------------------------------------------|------------------------|-------|------------------------------------------------------------------|-------------------------------------------------------|------------------------------------------------------------------------------------|------------------------------------------------------------------------|--------------------------------------------------------|
| Secondary Care | 48-72 hour review           | The impact of a new antimicrobial drug chart on prescribed antibiotics at 48-72 hours | New antimicrobial prescribing chart                               | Use of practice aids   | O     | Yes                                                              |                                                       | Yes                                                                                | Yes                                                                    | Yes                                                    |
| Secondary Care | Therapeutic Drug Monitoring | Triazole therapeutic drug monitoring                                                  | Future plans to introduce SOP with prospective audit and feedback | Guideline or procedure | C     | Yes                                                              | Yes                                                   |                                                                                    | Yes                                                                    | Yes                                                    |

Learner improvement project activities (n=83)

| Sector             | Topic category                          | Improvement topic                                                                                                                   | Intervention or change idea             | Intervention category   | COM-B | Secured input or support from colleagues to undertake QI project | Collected data that improved understanding of problem | Gained new learning from implementing and evaluating a test of change (PDSA cycle) | Shared information and awareness about initiative outside of core team | Educated others to develop knowledge skills, attitudes |
|--------------------|-----------------------------------------|-------------------------------------------------------------------------------------------------------------------------------------|-----------------------------------------|-------------------------|-------|------------------------------------------------------------------|-------------------------------------------------------|------------------------------------------------------------------------------------|------------------------------------------------------------------------|--------------------------------------------------------|
| Community pharmacy | Patient understanding of antimicrobials | Community pharmacy antibiotic dispensing (To improve patient understanding and self-management of conditions requiring antibiotics) | Community Pharmacy Antibiotic checklist | Use of practice aids    | C     |                                                                  | Yes                                                   |                                                                                    |                                                                        |                                                        |
| Community pharmacy | Upper respiratory tract infections      | Self-limiting URTIs (TBA)                                                                                                           | Academic detailing/education            | Education and promotion | C     |                                                                  |                                                       |                                                                                    |                                                                        |                                                        |
| Community pharmacy | Upper respiratory tract infections      | Self-limiting URTIs (TBA)                                                                                                           | Academic detailing/education            | Education and promotion | C     | Yes                                                              |                                                       |                                                                                    |                                                                        |                                                        |

Learner improvement project activities (n=83)

| Sector             | Topic category                     | Improvement topic                                                                                       | Intervention or change idea             | Intervention category          | COM-B    | Secured input or support from colleagues to undertake QI project | Collected data that improved understanding of problem | Gained new learning from implementing and evaluating a test of change (PDSA cycle) | Shared information and awareness about initiative outside of core team | Educated others to develop knowledge skills, attitudes |
|--------------------|------------------------------------|---------------------------------------------------------------------------------------------------------|-----------------------------------------|--------------------------------|----------|------------------------------------------------------------------|-------------------------------------------------------|------------------------------------------------------------------------------------|------------------------------------------------------------------------|--------------------------------------------------------|
| Community pharmacy | Antibiotic duration                | Duration of antibiotic prescriptions (Improve GP prescribing of antibiotics in line with NICE guidance) |                                         |                                |          |                                                                  |                                                       |                                                                                    |                                                                        |                                                        |
| Community pharmacy | Broad spectrum antimicrobials      | Co-amoxiclav prescribing (To reduce inappropriate prescribing)                                          | Prospective audit and feedback          | Prospective audit and feedback | Multiple | Yes                                                              |                                                       |                                                                                    | Yes                                                                    |                                                        |
| Community pharmacy | Upper respiratory tract infections | Self-limiting URTIs (Reduce patient demand for GP practices for antibiotics)                            | Community Pharmacy Antibiotic checklist | Use of practice aids           | C        |                                                                  |                                                       |                                                                                    |                                                                        | Yes                                                    |



Learner improvement project activities (n=83)

| Sector       | Topic category                | Improvement topic                                                                             | Intervention or change idea                  | Intervention category     | COM-B | Secured input or support from colleagues to undertake QI project | Collected data that improved understanding of problem | Gained new learning from implementing and evaluating a test of change (PDSA cycle) | Shared information and awareness about initiative outside of core team | Educated others to develop knowledge skills, attitudes |
|--------------|-------------------------------|-----------------------------------------------------------------------------------------------|----------------------------------------------|---------------------------|-------|------------------------------------------------------------------|-------------------------------------------------------|------------------------------------------------------------------------------------|------------------------------------------------------------------------|--------------------------------------------------------|
| Primary care | UTI                           | UTI (Improve appropriateness of UTI prescribing)                                              |                                              |                           |       |                                                                  |                                                       |                                                                                    |                                                                        |                                                        |
| Primary care | UTI                           | UTI (Reduce frequency of UTI diagnosis associated with urine dipstick testing)                | Sharing and benchmarking practice-level data | Social norms benchmarking | O     | Yes                                                              |                                                       |                                                                                    |                                                                        |                                                        |
| Primary care | Broad spectrum antimicrobials | Broad spectrum antibiotics (Improve appropriateness of broad-spectrum antibiotic prescribing) |                                              |                           |       |                                                                  |                                                       |                                                                                    |                                                                        |                                                        |

Learner improvement project activities (n=83)

| Sector       | Topic category                     | Improvement topic                                                                 | Intervention or change idea  | Intervention category   | COM-B | Secured input or support from colleagues to undertake QI project | Collected data that improved understanding of problem | Gained new learning from implementing and evaluating a test of change (PDSA cycle) | Shared information and awareness about initiative outside of core team | Educated others to develop knowledge skills, attitudes |
|--------------|------------------------------------|-----------------------------------------------------------------------------------|------------------------------|-------------------------|-------|------------------------------------------------------------------|-------------------------------------------------------|------------------------------------------------------------------------------------|------------------------------------------------------------------------|--------------------------------------------------------|
| Primary care | UTI                                | UTI (To improve appropriateness of UTI prescribing in the elderly (>70 years))    |                              |                         |       |                                                                  |                                                       |                                                                                    |                                                                        |                                                        |
| Primary care | Other                              | Antibiotic appropriateness (To improve protocol prescribing on electronic system) | Academic detailing/education | Education and promotion | C     |                                                                  |                                                       |                                                                                    |                                                                        |                                                        |
| Primary care | Lower respiratory tract infections | Clarithromycin (To reduce inappropriateness of clarithromycin prescribing)        |                              |                         |       |                                                                  |                                                       |                                                                                    |                                                                        |                                                        |

Learner improvement project activities (n=83)

| Sector       | Topic category | Improvement topic                                                       | Intervention or change idea        | Intervention category   | COM-B | Secured input or support from colleagues to undertake QI project | Collected data that improved understanding of problem | Gained new learning from implementing and evaluating a test of change (PDSA cycle) | Shared information and awareness about initiative outside of core team | Educated others to develop knowledge skills, attitudes |
|--------------|----------------|-------------------------------------------------------------------------|------------------------------------|-------------------------|-------|------------------------------------------------------------------|-------------------------------------------------------|------------------------------------------------------------------------------------|------------------------------------------------------------------------|--------------------------------------------------------|
| Primary care | UTI            | UTI (Reduce overdiagnosis of UTI in care homes due to dipstick testing) | Adapt existing UTI assessment form | Use of practice aids    | C     | Yes                                                              |                                                       |                                                                                    | Yes                                                                    |                                                        |
| Primary care | UTI            | UTI (To improve prescribing guideline compliance)                       | Academic detailing/education       | Education and promotion | C     | Yes                                                              |                                                       |                                                                                    | Yes                                                                    |                                                        |
| Primary care | UTI            | UTI (Reduce trimethoprim/nitrofurantoin prescribing rate)               | EMIS prompt                        | Prompts and reminders   | M     | Yes                                                              |                                                       |                                                                                    |                                                                        |                                                        |

Learner improvement project activities (n=83)

| Sector       | Topic category                     | Improvement topic                                                                                   | Intervention or change idea                                               | Intervention category   | COM-B | Secured input or support from colleagues to undertake QI project | Collected data that improved understanding of problem | Gained new learning from implementing and evaluating a test of change (PDSA cycle) | Shared information and awareness about initiative outside of core team | Educated others to develop knowledge skills, attitudes |
|--------------|------------------------------------|-----------------------------------------------------------------------------------------------------|---------------------------------------------------------------------------|-------------------------|-------|------------------------------------------------------------------|-------------------------------------------------------|------------------------------------------------------------------------------------|------------------------------------------------------------------------|--------------------------------------------------------|
| Primary care | Upper respiratory tract infections | Sore throat (Improve formulary compliance and use of risk stratification tool (FEVERPAIN) )         | Incorporate FEVERPAIN tool into EMIS                                      | Use of practice aids    | C     | Yes                                                              |                                                       |                                                                                    |                                                                        |                                                        |
| Primary care | Lower respiratory tract infections | COPD (Reduce inappropriate prescribing of antibiotic rescue packs)                                  | Implement/change guidance                                                 | Guideline or procedure  | O     | Yes                                                              |                                                       |                                                                                    |                                                                        |                                                        |
| Primary care | Antibiotic allergy                 | Antibiotic allergy (Increase proportion of penicillin allergic patients with this documented in MR) | Train healthcare assistants to obtain information on antibiotic allergies | Education and promotion | C     |                                                                  |                                                       |                                                                                    |                                                                        |                                                        |

Learner improvement project activities (n=83)

| Sector         | Topic category                | Improvement topic                                                                 | Intervention or change idea    | Intervention category | COM-B | Secured input or support from colleagues to undertake QI project | Collected data that improved understanding of problem | Gained new learning from implementing and evaluating a test of change (PDSA cycle) | Shared information and awareness about initiative outside of core team | Educated others to develop knowledge skills, attitudes |
|----------------|-------------------------------|-----------------------------------------------------------------------------------|--------------------------------|-----------------------|-------|------------------------------------------------------------------|-------------------------------------------------------|------------------------------------------------------------------------------------|------------------------------------------------------------------------|--------------------------------------------------------|
| Primary care   | Broad spectrum antimicrobials | Broad spectrum antibiotics (Improve appropriateness of prescribing)               | Reminder/prompts               | Prompts and reminders | M     | Yes                                                              |                                                       |                                                                                    |                                                                        |                                                        |
| Primary care   | Other                         | Antibiotic repeat prescribing (Improve regular review of long-term prescriptions) | Reminder/prompts; case-finding | Prompts and reminders | M     | Yes                                                              |                                                       |                                                                                    |                                                                        |                                                        |
| Primary care   | UTI                           | UTI (Reduce trimethoprim/nitrofurantoin prescribing rate)                         |                                |                       |       |                                                                  |                                                       |                                                                                    |                                                                        |                                                        |
| Secondary Care | Broad spectrum antimicrobials | Co-amoxiclav prescribing (Improve guideline compliance )                          |                                |                       |       | Yes                                                              |                                                       |                                                                                    | Yes                                                                    |                                                        |

Learner improvement project activities (n=83)

| Sector         | Topic category                     | Improvement topic                                                                                         | Intervention or change idea  | Intervention category   | COM-B | Secured input or support from colleagues to undertake QI project | Collected data that improved understanding of problem | Gained new learning from implementing and evaluating a test of change (PDSA cycle) | Shared information and awareness about initiative outside of core team | Educated others to develop knowledge skills, attitudes |
|----------------|------------------------------------|-----------------------------------------------------------------------------------------------------------|------------------------------|-------------------------|-------|------------------------------------------------------------------|-------------------------------------------------------|------------------------------------------------------------------------------------|------------------------------------------------------------------------|--------------------------------------------------------|
| Secondary Care | Antibiotic allergy                 | Antibiotic allergy (To reduce incidents due to prescribing of antibiotics where an allergy is documented) | Academic detailing/education | Education and promotion | C     |                                                                  |                                                       |                                                                                    |                                                                        |                                                        |
| Secondary Care | Antibiotic duration                | Antibiotic duration (Improve documentation of antibiotic duration)                                        | Academic detailing/education | Education and promotion | C     | Yes                                                              | Yes                                                   |                                                                                    |                                                                        |                                                        |
| Secondary Care | Lower respiratory tract infections | CAP (To improve frequency of CURB65 score documentation)                                                  |                              |                         |       | Yes                                                              |                                                       |                                                                                    | Yes                                                                    |                                                        |

Learner improvement project activities (n=83)

| Sector         | Topic category                     | Improvement topic                                                      | Intervention or change idea                                             | Intervention category          | COM-B    | Secured input or support from colleagues to undertake QI project | Collected data that improved understanding of problem | Gained new learning from implementing and evaluating a test of change (PDSA cycle) | Shared information and awareness about initiative outside of core team | Educated others to develop knowledge skills, attitudes |
|----------------|------------------------------------|------------------------------------------------------------------------|-------------------------------------------------------------------------|--------------------------------|----------|------------------------------------------------------------------|-------------------------------------------------------|------------------------------------------------------------------------------------|------------------------------------------------------------------------|--------------------------------------------------------|
| Secondary Care | UTI                                | UTI (Improve appropriateness of UTI prescribing (CQUIN))               | Academic detailing/education; prospective audit and feedback, education | Prospective audit and feedback | Multiple | Yes                                                              |                                                       |                                                                                    | Yes                                                                    |                                                        |
| Secondary Care | Therapeutic Drug Monitoring        | Antifungal TDM (Increase proportion of TDM in patients who require it) | Implement/change guidance; implement/change procedure(s)                | Guideline or procedure         | O        | Yes                                                              |                                                       |                                                                                    | Yes                                                                    |                                                        |
| Secondary Care | UTI                                | UTI (Improve review of microbiology samples to guide treatment review) | Academic detailing/education; implement/change procedure(s)             | Guideline or procedure         | Multiple | Yes                                                              |                                                       |                                                                                    | Yes                                                                    |                                                        |
| Secondary Care | Lower respiratory tract infections | Bronchiectasis (Rationalise duration of therapy)                       | Implement/change guidance                                               | Guideline or procedure         | O        | Yes                                                              |                                                       |                                                                                    | Yes                                                                    |                                                        |

Learner improvement project activities (n=83)

| Sector         | Topic category                | Improvement topic                                                                                   | Intervention or change idea                  | Intervention category  | COM-B | Secured input or support from colleagues to undertake QI project | Collected data that improved understanding of problem | Gained new learning from implementing and evaluating a test of change (PDSA cycle) | Shared information and awareness about initiative outside of core team | Educated others to develop knowledge skills, attitudes |
|----------------|-------------------------------|-----------------------------------------------------------------------------------------------------|----------------------------------------------|------------------------|-------|------------------------------------------------------------------|-------------------------------------------------------|------------------------------------------------------------------------------------|------------------------------------------------------------------------|--------------------------------------------------------|
| Secondary Care | Other                         | Gonorrhoea (Improve appropriateness of prescribing)                                                 | Implement /change guidance                   | Guideline or procedure | O     |                                                                  |                                                       |                                                                                    |                                                                        |                                                        |
| Secondary Care | Antibiotic wastage            | Reducing antibiotic wastage                                                                         |                                              |                        |       |                                                                  |                                                       |                                                                                    |                                                                        |                                                        |
| Secondary Care | Antibiotic dosing             | Gentamicin (To reduce gentamicin-related incidents by ensuring correct prescribing and monitoring ) | EPMA alert/prompt                            | Prompts and reminders  | M     |                                                                  |                                                       |                                                                                    |                                                                        |                                                        |
| Secondary Care | Broad spectrum antimicrobials | Antibiotic prescription review (Improve uptake of restricted antimicrobial form)                    | Adapt existing restricted antimicrobial form | Use of practice aids   | O     | Yes                                                              |                                                       |                                                                                    |                                                                        |                                                        |



Learner improvement project activities (n=83)

| Sector         | Topic category       | Improvement topic                                                          | Intervention or change idea          | Intervention category          | COM-B    | Secured input or support from colleagues to undertake QI project | Collected data that improved understanding of problem | Gained new learning from implementing and evaluating a test of change (PDSA cycle) | Shared information and awareness about initiative outside of core team | Educated others to develop knowledge skills, attitudes |
|----------------|----------------------|----------------------------------------------------------------------------|--------------------------------------|--------------------------------|----------|------------------------------------------------------------------|-------------------------------------------------------|------------------------------------------------------------------------------------|------------------------------------------------------------------------|--------------------------------------------------------|
| Secondary Care | 48-72 hour review    | 72-hour review (Improve documentation of 72-hour review)                   | Reminder prompt at daily board round | Prompts and reminders          | M        |                                                                  |                                                       |                                                                                    |                                                                        |                                                        |
| Secondary Care | Antibiotic wastage   | Antibiotic wastage in PD peritonitis patients                              | Implement/change procedure(s)        | Guideline or procedure         | O        | Yes                                                              |                                                       |                                                                                    |                                                                        |                                                        |
| Secondary Care | Antibiotic duration  | Duration of antibiotic therapy on vascular ward                            | Regular feedback during ward rounds  | Prospective audit and feedback | Multiple | Yes                                                              |                                                       |                                                                                    |                                                                        |                                                        |
| Secondary Care | Antibiotic duration  | Documentation of antibiotic duration on EPMA                               | Electronic rules/restrictions        | Restriction                    | O        | Yes                                                              |                                                       |                                                                                    |                                                                        |                                                        |
| Secondary Care | Surgical prophylaxis | Surgical prophylaxis (Reduce inappropriate prolonged duration prescribing) | Academic detailing/education         | Education and promotion        | C        |                                                                  |                                                       |                                                                                    |                                                                        |                                                        |

Learner improvement project activities (n=83)

| Sector         | Topic category                     | Improvement topic                                                        | Intervention or change idea                                          | Intervention category          | COM-B    | Secured input or support from colleagues to undertake QI project | Collected data that improved understanding of problem | Gained new learning from implementing and evaluating a test of change (PDSA cycle) | Shared information and awareness about initiative outside of core team | Educated others to develop knowledge skills, attitudes |
|----------------|------------------------------------|--------------------------------------------------------------------------|----------------------------------------------------------------------|--------------------------------|----------|------------------------------------------------------------------|-------------------------------------------------------|------------------------------------------------------------------------------------|------------------------------------------------------------------------|--------------------------------------------------------|
| Secondary Care | Antibiotic allergy                 | Antibiotic allergy (Improve documentation of penicillin allergy in EPMA) | EPMA nudge prompts                                                   | Prompts and reminders          | M        | Yes                                                              |                                                       |                                                                                    |                                                                        |                                                        |
| Secondary Care | Lower respiratory tract infections | CAP (Improve guideline compliance )                                      | Review local guidance                                                | Guideline or procedure         | O        |                                                                  |                                                       |                                                                                    |                                                                        |                                                        |
| Secondary Care | Other                              | Antibiotic utilisation monitoring                                        |                                                                      |                                |          | Yes                                                              |                                                       |                                                                                    |                                                                        |                                                        |
| Secondary Care | 48-72 hour review                  | 72-hour review in cardiac surgery paediatric patients                    | Regular joint prescription review between pharmacist and prescribers | Prospective audit and feedback | Multiple |                                                                  | Yes                                                   |                                                                                    |                                                                        |                                                        |
| Secondary Care | 48-72 hour review                  | 72-hour review                                                           | Prospective audit and feedback facilitated by mobile app             | Prospective audit and feedback | Multiple | Yes                                                              |                                                       |                                                                                    |                                                                        |                                                        |

Learner improvement project activities (n=83)

| Sector             | Topic category                          | Improvement topic                                                 | Intervention or change idea                                                         | Intervention category   | COM-B | Secured input or support from colleagues to undertake QI project | Collected data that improved understanding of problem | Gained new learning from implementing and evaluating a test of change (PDSA cycle) | Shared information and awareness about initiative outside of core team | Educated others to develop knowledge skills, attitudes |
|--------------------|-----------------------------------------|-------------------------------------------------------------------|-------------------------------------------------------------------------------------|-------------------------|-------|------------------------------------------------------------------|-------------------------------------------------------|------------------------------------------------------------------------------------|------------------------------------------------------------------------|--------------------------------------------------------|
| Secondary Care     | Documentation of indication             | Documenting indication                                            |                                                                                     |                         |       |                                                                  |                                                       |                                                                                    |                                                                        |                                                        |
| Secondary Care     | Other                                   | Compliance with sepsis 6 bundle                                   | Education                                                                           | Education and promotion | C     | Yes                                                              | Yes                                                   |                                                                                    |                                                                        |                                                        |
| Community pharmacy | Patient understanding of antimicrobials | Patient adherence with antibiotic prescription instructions       | Revising standard operating procedures-antibiotic labelling and patient counselling | Guideline or procedure  | C     | Yes                                                              | Yes                                                   | Yes                                                                                | Yes                                                                    | Yes                                                    |
| Community pharmacy | UTI                                     | Quality of antibiotic counselling and prescription review for UTI | Implement Community Pharmacy Checklist                                              | Use of practice aids    | C     | Yes                                                              | Yes                                                   |                                                                                    | Yes                                                                    | Yes                                                    |

Learner improvement project activities (n=83)

| Sector       | Topic category                | Improvement topic              | Intervention or change idea                                                                                          | Intervention category          | COM-B    | Secured input or support from colleagues to undertake QI project | Collected data that improved understanding of problem | Gained new learning from implementing and evaluating a test of change (PDSA cycle) | Shared information and awareness about initiative outside of core team | Educated others to develop knowledge skills, attitudes |
|--------------|-------------------------------|--------------------------------|----------------------------------------------------------------------------------------------------------------------|--------------------------------|----------|------------------------------------------------------------------|-------------------------------------------------------|------------------------------------------------------------------------------------|------------------------------------------------------------------------|--------------------------------------------------------|
| Primary Care | Broad spectrum antimicrobials | Co-amoxiclav prescribing       | Regular prospective audit and feedback; dissemination of updated formulary                                           | Prospective audit and feedback | Multiple | Yes                                                              | Yes                                                   |                                                                                    | Yes                                                                    | Yes                                                    |
| Primary Care | Broad spectrum antimicrobials | Co-amoxiclav prescribing       | Electronic clinical decision support (TARGET, consultation template); audit and feedback; introduce incentive scheme | Clinical decision support      | C        |                                                                  |                                                       |                                                                                    |                                                                        |                                                        |
| Primary Care | UTI                           | Nitrofurantoin UTI prophylaxis | TBC                                                                                                                  |                                |          | Yes                                                              | Yes                                                   |                                                                                    |                                                                        |                                                        |

Learner improvement project activities (n=83)

| Sector         | Topic category                     | Improvement topic                                            | Intervention or change idea                | Intervention category   | COM-B | Secured input or support from colleagues to undertake QI project | Collected data that improved understanding of problem | Gained new learning from implementing and evaluating a test of change (PDSA cycle) | Shared information and awareness about initiative outside of core team | Educated others to develop knowledge skills, attitudes |
|----------------|------------------------------------|--------------------------------------------------------------|--------------------------------------------|-------------------------|-------|------------------------------------------------------------------|-------------------------------------------------------|------------------------------------------------------------------------------------|------------------------------------------------------------------------|--------------------------------------------------------|
| Secondary Care | Antibiotic dosing                  | Quality of IV antibiotic dosing in paediatrics               | TBC                                        |                         |       |                                                                  | Yes                                                   |                                                                                    | Yes                                                                    |                                                        |
| Secondary Care | Other                              | Outpatient microbiological during outpatient surgical follow | Checklist and standard operating procedure | Guideline or procedure  | C     | Yes                                                              | Yes                                                   |                                                                                    | Yes                                                                    | Yes                                                    |
| Secondary Care | Lower respiratory tract infections | Antibiotic prescribing in CAP                                | Education and posters                      | Education and promotion | C     | Yes                                                              |                                                       | Yes                                                                                | Yes                                                                    | Yes                                                    |
| Secondary Care | Surgical prophylaxis               | Surgical prophylaxis                                         | Change local guidelines; education         | Guideline or procedure  | O     | Yes                                                              | Yes                                                   | Yes                                                                                | Yes                                                                    | Yes                                                    |

Learner improvement project activities (n=83)

| Sector         | Topic category         | Improvement topic                                         | Intervention or change idea                                                   | Intervention category  | COM-B    | Secured input or support from colleagues to undertake QI project | Collected data that improved understanding of problem | Gained new learning from implementing and evaluating a test of change (PDSA cycle) | Shared information and awareness about initiative outside of core team | Educated others to develop knowledge skills, attitudes |
|----------------|------------------------|-----------------------------------------------------------|-------------------------------------------------------------------------------|------------------------|----------|------------------------------------------------------------------|-------------------------------------------------------|------------------------------------------------------------------------------------|------------------------------------------------------------------------|--------------------------------------------------------|
| Secondary Care | Antibiotic allergy     | Documentation of antibiotic indication and allergy status | TBC                                                                           |                        |          |                                                                  |                                                       |                                                                                    |                                                                        |                                                        |
| Secondary Care | Other                  | Ciprofloxacin prescribing for SBP prophylaxis             | New procedure to flag review of patients on prophylaxis for more than 2 years | Guideline or procedure | M        | Yes                                                              | Yes                                                   |                                                                                    | Yes                                                                    |                                                        |
| Secondary Care | Antibiotic dosing      | Quality of teicoplanin dosing                             | TBC                                                                           |                        |          |                                                                  | Yes                                                   |                                                                                    |                                                                        |                                                        |
| Secondary Care | Diagnostic stewardship | Use of urine dipsticks for UTI diagnosis                  | Education and restriction of dipstick use by nursing staff                    | Restriction            | Multiple | Yes                                                              | Yes                                                   | Yes                                                                                | Yes                                                                    | Yes                                                    |

Learner improvement project activities (n=83)

| Sector         | Topic category       | Improvement topic                                       | Intervention or change idea                               | Intervention category   | COM-B    | Secured input or support from colleagues to undertake QI project | Collected data that improved understanding of problem | Gained new learning from implementing and evaluating a test of change (PDSA cycle) | Shared information and awareness about initiative outside of core team | Educated others to develop knowledge skills, attitudes |
|----------------|----------------------|---------------------------------------------------------|-----------------------------------------------------------|-------------------------|----------|------------------------------------------------------------------|-------------------------------------------------------|------------------------------------------------------------------------------------|------------------------------------------------------------------------|--------------------------------------------------------|
| Secondary Care | Antibiotic dosing    | Antibiotic dosing on surgical ward                      | Introduce dose banding chart                              | Use of practice aids    | C        | Yes                                                              | Yes                                                   | Yes                                                                                | Yes                                                                    | Yes                                                    |
| Secondary Care | UTI                  | Quality of UTI antibiotic prescribing                   | Education, UTI prompt cards and prescription form changes | Use of practice aids    | Multiple |                                                                  |                                                       |                                                                                    |                                                                        |                                                        |
| Secondary Care | Other                | Central line management in OPAT service                 | Communication checklist                                   | Use of practice aids    | C        | Yes                                                              | Yes                                                   |                                                                                    | Yes                                                                    | Yes                                                    |
| Secondary Care | Surgical prophylaxis | Surgical prophylaxis in elective orthopaedic procedures | Education and posters                                     | Education and promotion | C        | Yes                                                              | Yes                                                   |                                                                                    |                                                                        |                                                        |

Learner improvement project activities (n=83)

| Sector         | Topic category              | Improvement topic                                               | Intervention or change idea     | Intervention category | COM-B | Secured input or support from colleagues to undertake QI project | Collected data that improved understanding of problem | Gained new learning from implementing and evaluating a test of change (PDSA cycle) | Shared information and awareness about initiative outside of core team | Educated others to develop knowledge skills, attitudes |
|----------------|-----------------------------|-----------------------------------------------------------------|---------------------------------|-----------------------|-------|------------------------------------------------------------------|-------------------------------------------------------|------------------------------------------------------------------------------------|------------------------------------------------------------------------|--------------------------------------------------------|
| Secondary Care | Surgical prophylaxis        | Prolonged antibiotic surgical prophylaxis in elective surgeries | Electronic prescribing template | Restriction           | O     | Yes                                                              | Yes                                                   |                                                                                    | Yes                                                                    |                                                        |
| Secondary Care | Documentation of indication | Documentation of indication and guideline compliance            | TBC                             |                       |       |                                                                  | Yes                                                   |                                                                                    |                                                                        |                                                        |
