# Supplementary material for: Outcomes of a National, Cross-Sector Antimicrobial Stewardship Training Initiative for Pharmacists in England
Source: MDPI journal article supplement (doi:10.3390/pharmacy9040165), 2021-10-10
Supplement: s1 [file s1]

# Antimicrobial Stewardship Training Day Programme

| Time          | Session                                                                         |
|---------------|---------------------------------------------------------------------------------|
| 10:00 – 10:30 | Registration, tea and networking                                                |
| 10:30 – 11:00 | Welcome and introductions                                                       |
| 11:00 – 11:40 | Tackling AMR through AMS interventions                                          |
| 11:40 – 12:40 | Using AMR/AMS Data for Action                                                   |
| 12:40 – 13:20 | Lunch and networking                                                            |
| 13:20 – 15:00 | Designing Antimicrobial Stewardship interventions using behaviour change theory |
| 15:00 – 15:15 | Refreshments                                                                    |
| 15:15 – 17:15 | Applying quality improvement to Antimicrobial Stewardship                       |
| 17:15 – 17:30 | Feedback surveys, action planning, and next steps                               |
