# Supplementary material for: Outcomes of a National, Cross-Sector Antimicrobial Stewardship Training Initiative for Pharmacists in England
Source: MDPI journal article supplement (doi:10.3390/pharmacy9040165), 2021-10-10
Supplement: s1 [file s1]

---

## Summary of survey responses

---

### *Learner experience*

---

| Cohort 1 (n=10):                                                                                                      | Cohort 2 (n=39)                                                                                                                                                                                                                     | Cohort 3 (n=13)                                                                                                                                                           |
|-----------------------------------------------------------------------------------------------------------------------|-------------------------------------------------------------------------------------------------------------------------------------------------------------------------------------------------------------------------------------|---------------------------------------------------------------------------------------------------------------------------------------------------------------------------|
| Rate your satisfaction with the training on a scale of 1 to 10<br>(1 = "very dissatisfied" and 10 = "very satisfied") | Satisfaction with the training:                                                                                                                                                                                                     | Overall experience of the training:                                                                                                                                       |
| Average satisfaction rating: 8.3 out of 10                                                                            | <ul style="list-style-type: none"> <li>• "Very satisfied" (26%)</li> <li>• "Satisfied" (59%)</li> <li>• "Neither satisfied or dissatisfied" (10%)</li> <li>• "Dissatisfied" (2.5%)</li> <li>• "Very dissatisfied" (2.5%)</li> </ul> | <ul style="list-style-type: none"> <li>• "Very good" (92%)</li> <li>• "Good" (8%)</li> <li>• "Average" (0%)</li> <li>• "Poor" (0%)</li> <li>• "Very poor" (0%)</li> </ul> |

---

### *Value of the training*

---

| Cohort 1 (n=10):                                                                                        | Cohort 2 (n=39)                                                                                         | Cohort 3 (n=13)                                                                                                                                                                                                                                                            |
|---------------------------------------------------------------------------------------------------------|---------------------------------------------------------------------------------------------------------|----------------------------------------------------------------------------------------------------------------------------------------------------------------------------------------------------------------------------------------------------------------------------|
| Would you recommend the training to a colleague?                                                        | Would you recommend the training to a colleague?                                                        | "Learning outcomes were relevant and appropriate to my practice"                                                                                                                                                                                                           |
| <ul style="list-style-type: none"> <li>• Yes (80%)</li> <li>• Maybe (20%)</li> <li>• No (0%)</li> </ul> | <ul style="list-style-type: none"> <li>• Yes (90%)</li> <li>• Maybe (10%)</li> <li>• No (0%)</li> </ul> | <ul style="list-style-type: none"> <li>• Strongly agree (62%)</li> <li>• Agree (38%)</li> <li>• Neither agree or disagree (0%)</li> <li>• Disagree (0%)</li> <li>• Strongly disagree (0%)</li> </ul>                                                                       |
|                                                                                                         |                                                                                                         | <p>"Participating in this training was a valuable use of my time"</p> <ul style="list-style-type: none"> <li>• Strongly agree (85%)</li> <li>• Agree (15%)</li> <li>• Neither agree or disagree (0%)</li> <li>• Disagree (0%)</li> <li>• Strongly disagree (0%)</li> </ul> |

---
