# Supplementary material for: Outcomes of a National, Cross-Sector Antimicrobial Stewardship Training Initiative for Pharmacists in England
Source: Pharmacy (Basel). 2021 Oct 10;9(4):165. doi: 10.3390/pharmacy9040165 (PMC8544733; doi:10.3390/pharmacy9040165)
Supplement: Supplementary file 1 [file pharmacy-09-00165-s001.zip]

Archive with 6 entries (6 files):
- Supplementary materials (S1) - introductory workshop outline.pdf
- Supplementary materials (S2) - learner survey questions.pdf
- Supplementary materials (S3) - Knowledge quiz (cohort 1).pdf
- Supplementary materials (S4) - Knowledge quiz (cohorts 2 and 3).pdf
- Supplementary materials (S5) - Learner improvement project activities.pdf
- Supplementary materials (S6)- learner feedback survey responses (learner experience and value of training).pdf
